# Supplementary material for: Sonoluminescence Spectra in the First Tens of Seconds of Sonolysis of [BEPip][NTf2], at 20 kHz under Ar
Source: MDPI journal article supplement (doi:10.3390/molecules27186050), 2022-09-16
Supplement: s1 [file s1]

# Sonoluminescence Spectra in the First Tens of Seconds of Sonolysis of [BEPip][NTf<sub>2</sub>], at 20 kHz under Ar

Rachel Pflieger <sup>1,\*</sup>, Manuel Lejeune <sup>2</sup> and Micheline Draye <sup>2</sup>

<sup>1</sup> ICSM, Univ Montpellier, CEA, CNRS, ENSCM, F-30207 Bagnols-sur-Cèze, France

<sup>2</sup> EDYTEM, University of Savoie Mont Blanc, F-73000 Chambéry, France

\* Correspondence: rachel.pflieger@cea.fr

## Supporting Information

**Citation:** Pflieger, R.; Lejeune, M.; Draye, M. Sonoluminescence Spectra in the First Tens of Seconds of Sonolysis of [BEPip][NTf<sub>2</sub>], at 20 kHz Under Ar. *Molecules* **2022**, *27*, 6050. <https://doi.org/10.3390/molecules27186050>

Academic Editor: Alessandro Chiasera

Received: 10 August 2022

Accepted: 6 September 2022

Published: 16 September 2022

**Publisher's Note:** MDPI stays neutral with regard to jurisdictional claims in published maps and institutional affiliations.

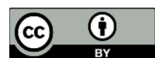

**Copyright:** © 2022 by the authors. Submitted for possible open access publication under the terms and conditions of the Creative Commons Attribution (CC BY) license (<https://creativecommons.org/licenses/by/4.0/>).

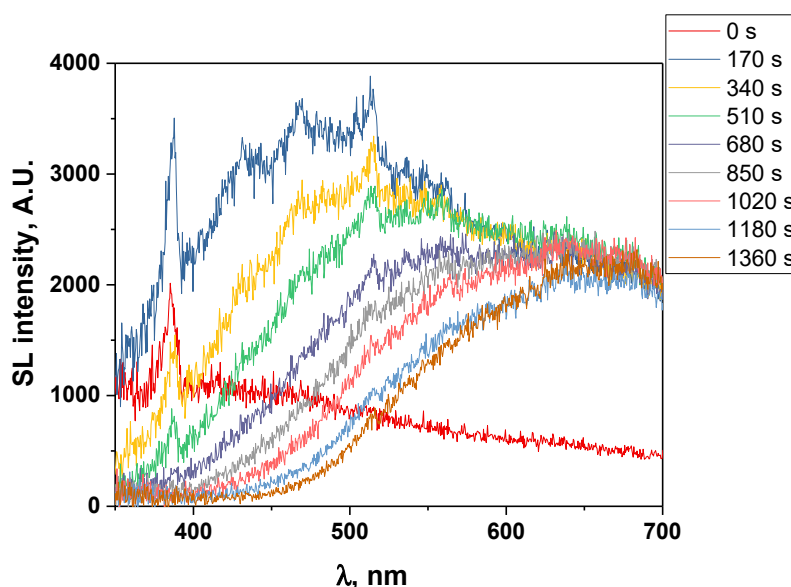

**Figure S1.** Time-evolution of the SL spectra of water-saturated [BEPip][NTf<sub>2</sub>] sonicated at 20 kHz under Ar flow. Degradation of the IL leads to increasing absorption of the SL light.

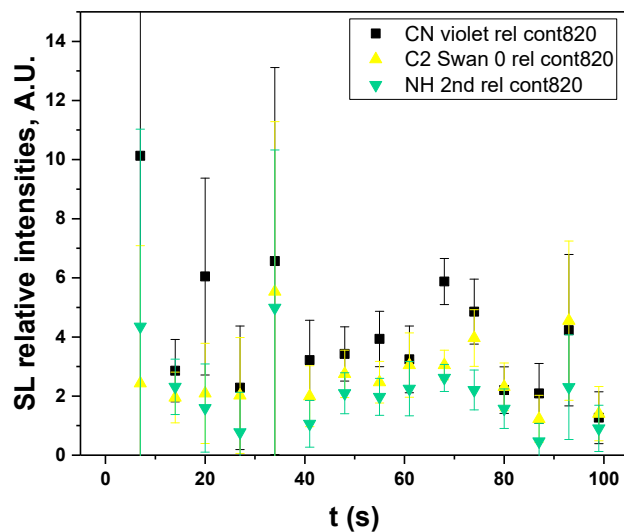

**Figure S2.** Evolution of the intensity of molecular emissions relatively to the SL continuum intensity (dry [BEPip][NTf<sub>2</sub>]) – the fact that they are not constant indicates a non perfect proportionality between the number of SL emitting bubbles and the number of bubbles presenting droplet injection.

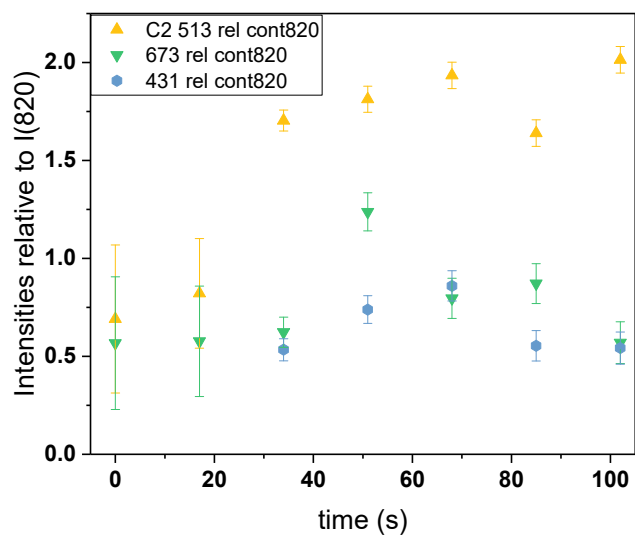

**Figure S3.** Evolution of the intensity of molecular emissions relatively to the SL continuum intensity (water-saturated [BEPip][NTf<sub>2</sub>]).
